# Supplementary material for: Subcellular Localization of Arabidopsis Pathogenesis-Related 1 (PR1) Protein
Source: MDPI journal article supplement (doi:10.3390/ijms18040825), 2017-04-13
Supplement: s1 [file s1]

# Supplementary Materials: Subcellular Localization of *Arabidopsis* Pathogenesis-Related 1 (PR1) Protein

Tamara Pečenková, Roman Pleskot and Viktor Žárský

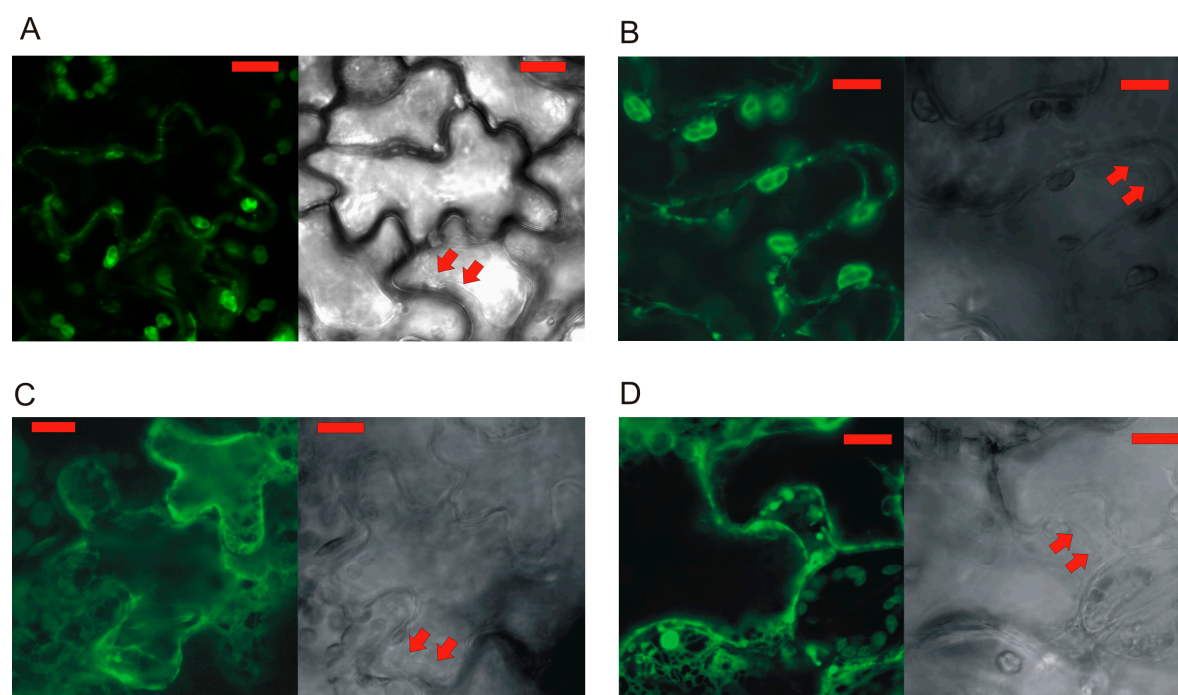

**Figure S1.** Mannitol and NaCl induced plasmolysis of leaf cells of *N. benthamiana* with transiently expressed PR1-GFP and PR1ΔC-GFP. Mannitol (A) and NaCl (C) induced plasmolysis of leaf cells of *N. benthamiana* with transiently expressed PR1-GFP; PR1ΔC-GFP in mannitol (B) and NaCl (D) induced plasmolysis. In both cases, the observation was performed in phosphate buffer with pH 9. Arrows point to spaces between the protoplast outlines and cell wall. Scale bar: 10 μm.

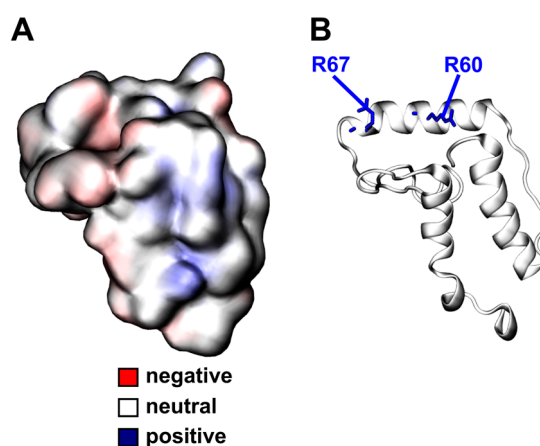

**Figure S2.** Electrostatic potential mapped on the surface of the homology model of the *Arabidopsis* PR1ΔC structure. (A) Electrostatic potential mapped on the surface of the homology model of the *Arabidopsis* PR1ΔC structure. (B) PR1ΔC lacks several positively charged amino acid residues which could be involved in the interaction with negatively charged phospholipids.

**Video S1.** Time-series scanning of PR1-GFP-positive vesicles. The strong signal of big body in the cytoplasm is autofluorescence of chloroplast. Scale bar: 10 μm.

**Video S2.** Time-series scanning of PI(3)P-PR1-GFP-positive vesicles.
